# Supplementary material for: Environmental Potential of Carbonized MOF-5/PANI Composites for Pesticide, Dye, and Metal Cations—Can They Actually Retain Them All?
Source: MDPI journal article supplement (doi:10.3390/polym15224349), 2023-11-07
Supplement: s1 [file s1]

Supplementary material

# Environmental Potential of Carbonized MOF-5/PANI Composites for Pesticide, Dye, and Metal Cations—Can They Actually Retain Them All?

Anka Jevremović <sup>1</sup>, Marjetka Savić <sup>2</sup>, Aleksandra Janošević Ležaić <sup>3</sup>, Jugoslav Krstić <sup>4</sup>, Nemanja Gavrilov <sup>1</sup>, Danica Bajuk-Bogdanović <sup>1</sup>, Maja Milojević-Rakić <sup>1,\*</sup> and Gordana Ćirić-Marjanović <sup>1</sup>

<sup>1</sup> University of Belgrade-Faculty of Physical Chemistry, Studentski trg 12-16, 11158 Belgrade, Serbia;

<sup>2</sup> Vinča Institute of Nuclear Science, University of Belgrade, National Institute of the Republic of Serbia, P.O. Box 522, 11001 Belgrade, Serbia;

<sup>3</sup> University of Belgrade-Faculty of Pharmacy, Vojvode Stepe 450, 11221 Belgrade, Serbia;

<sup>4</sup> University of Belgrade, Institute of Chemistry, Technology and Metallurgy, Department of Catalysis and Chemical Engineering, Njegoševa 12, 11000 Belgrade, Serbia;

\* Correspondence: maja@ffh.bg.ac.rs

**Citation:** Jevremović, A.; Savić, M.; Janošević Ležaić, A.; Krstić, J.; Gavrilov, N.; Bajuk-Bogdanović, D.; Milojević-Rakić, M.; Ćirić-Marjanović, G. Environmental Potential of Carbonized MOF-5/PANI Composites for Pesticide, Dye, and Metal Cations—Can They Actually Retain Them All? *Polymers* **2023**, *15*, x.

<https://doi.org/10.3390/xxxxx>

Academic Editors: Qina Sun, Lichun Xiao and Liazhou Song

Received: 7 October 2023

Revised: 31 October 2023

Accepted: 1 November 2023

Published: 3 November 2023

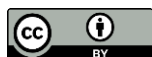

**Copyright:** © 2023 by the authors. Licensee MDPI, Basel, Switzerland. This article is an open access article distributed under the terms and conditions of the Creative Commons Attribution (CC BY) license (<https://creativecommons.org/licenses/by/4.0/>).

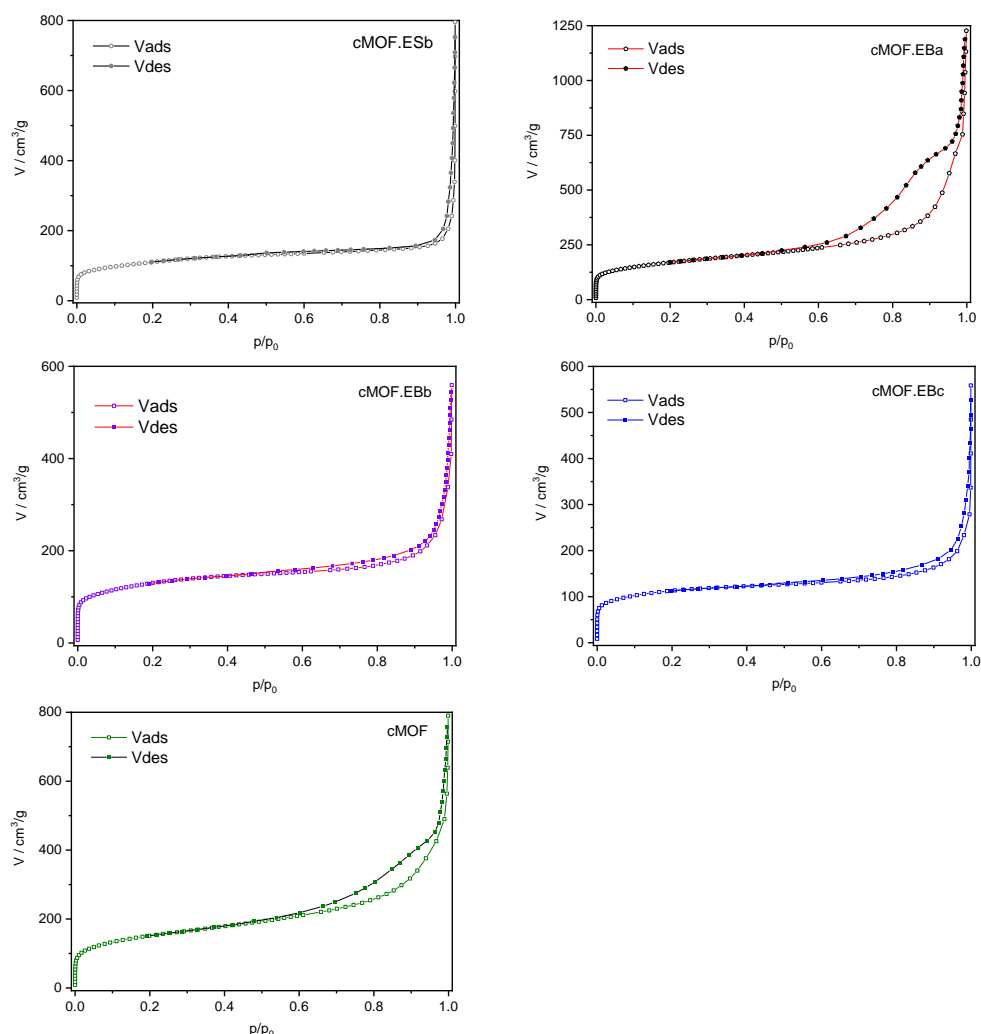

**Figure S1.** N<sub>2</sub> adsorption/desorption isotherms for C-(MOF-5/PANI) composites and cMOF.

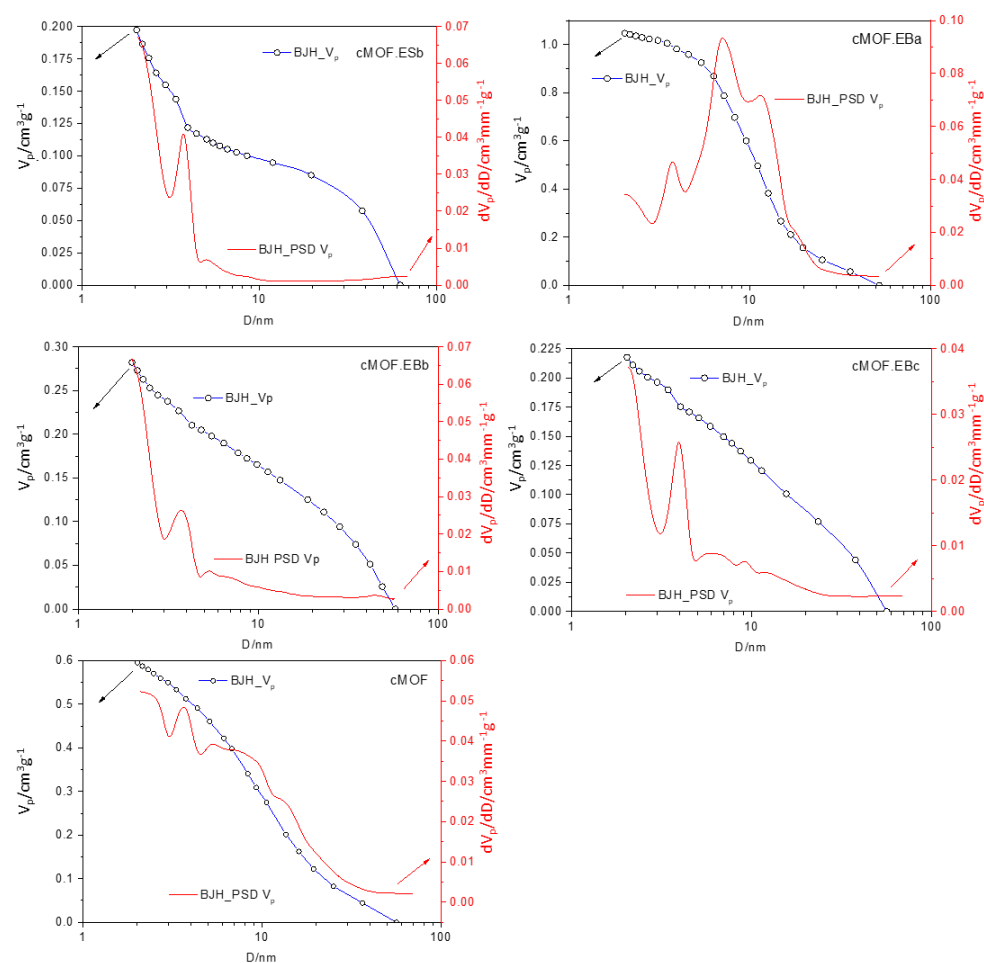

**Figure S2.** B. J. H. curves for pore size distribution (desorption branch of isotherm) with derivative profiles, given in red, for C-(MOF-5/PANI) composites and cMOF.

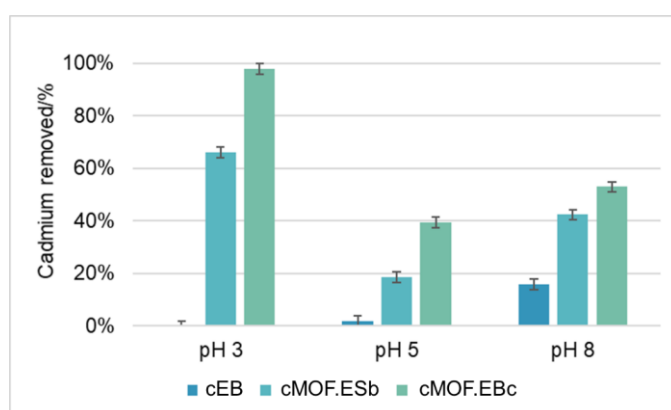

**Figure S3.** Percent of  $\text{Cd}^{2+}$  ions removed after adsorption on selected samples, measured for different suspension acidities, pH = 3, 5 and 8.
